# Supplementary material
Source: PubMed Central journal article supplement (PMC7658814)
Supplement: 20-00618.pdf [file 20-00618.pdf]

**On-line Table: Patient demographics, procedural characteristics, and posttreatment complications**

| Patient No. | Age (yr)/Sex | Cause of Occlusion | Prestroke Antiplatelet Therapy | IV Thrombolysis | Site of Stent Placement | Tandem Occlusion | Concomitant Intraoperative Aspirin | Reperfusion Hemorrhage (Type) | Intraoperative SAH or Vessel Perforation | In-Stent Thrombosis |
|-------------|--------------|--------------------|--------------------------------|-----------------|-------------------------|------------------|------------------------------------|-------------------------------|------------------------------------------|---------------------|
| 1           | 75/F         | Atheromatous       |                                | No              | Extracranial            | Yes              | No                                 | No                            | No                                       | No                  |
| 2           | 64/M         | Atheromatous       |                                | No              | Extracranial            | Yes              | No                                 | No                            | No                                       | No                  |
| 3           | 64/M         | Atheromatous       |                                | No              | Extracranial            | Yes              | Yes                                | No                            | Yes                                      | No                  |
| 4           | 61/M         | Atheromatous       |                                | Yes             | Extracranial            | Yes              | No                                 | No                            | No                                       | No                  |
| 5           | 78/M         | Atheromatous       |                                | Yes             | Extracranial            | Yes              | No                                 | No                            | Yes                                      | No                  |
| 6           | 64/M         | Atheromatous       |                                | No              | Extracranial            | Yes              | No                                 | No                            | No                                       | No                  |
| 7           | 63/F         | Atheromatous       | Aspirin                        | Yes             | Extracranial            | No               | Yes                                | No                            | No                                       | No                  |
| 8           | 85/F         | Atheromatous       |                                | No              | Intracranial            | No               | Yes                                | No                            | No                                       | No                  |
| 9           | 36/F         | Dissection         |                                | Yes             | Extracranial            | Yes              | No                                 | No                            | Yes                                      | No                  |
| 10          | 54/F         | Dissection         | Other anti-P2Y12               | No              | Intracranial            | No               | No                                 | No                            | No                                       | No                  |
| 11          | 71/M         | Atheromatous       | Anti-coagulation               | No              | Intracranial            | No               | Yes                                | No                            | No                                       | Yes                 |
| 12          | 56/M         | Atheromatous       | Dual-antiplatelet              | Yes             | Extracranial            | Yes              | No                                 | No                            | No                                       | No                  |
| 13          | 63/F         | Atheromatous       |                                | No              | Intracranial            | No               | Yes                                | No                            | No                                       | No                  |
| 14          | 81/F         | Atheromatous       | Other anti-P2Y12               | Yes             | Intracranial            | No               | No                                 | No                            | No                                       | Yes                 |
| 15          | 62/M         | Atheromatous       |                                | Yes             | Extracranial            | Yes              | No                                 | No                            | Yes                                      | No                  |
| 16          | 61/M         | Atheromatous       | Other anti-P2Y12               | Yes             | Extracranial            | Yes              | No                                 | No                            | No                                       | No                  |
| 17          | 56/M         | Atheromatous       |                                | No              | Extracranial            | No               | Yes                                | Yes (PH2)                     | No                                       | No                  |
| 18          | 80/M         | Atheromatous       |                                | Yes             | Extracranial            | Yes              | Yes                                | No                            | No                                       | No                  |
| 19          | 46/F         | Dissection         |                                | No              | Extracranial            | Yes              | No                                 | No                            | No                                       | No                  |
| 20          | 69/M         | Atheromatous       |                                | No              | Extracranial            | Yes              | Yes                                | Yes (PH1)                     | No                                       | No                  |
| 21          | 67/M         | Atheromatous       |                                | No              | Extracranial            | Yes              | No                                 | No                            | No                                       | No                  |
| 22          | 53/M         | Dissection         |                                | No              | Intracranial            | No               | Yes                                | No                            | No                                       | No                  |
| 23          | 72/M         | Atheromatous       | Dual-antiplatelet              | No              | Extracranial            | Yes              | No                                 | Yes (PH2)                     | No                                       | No                  |
| 24          | 64/M         | Atheromatous       | Aspirin                        | Yes             | Intracranial            | No               | No                                 | No                            | No                                       | No                  |
| 25          | 39/F         | Dissection         |                                | Yes             | Intracranial            | Yes              | No                                 | No                            | No                                       | No                  |
| 26          | 26/F         | Dissection         |                                | Yes             | Intracranial            | No               | Yes                                | No                            | No                                       | No                  |
| 27          | 80/M         | Atheromatous       |                                | No              | Extracranial            | No               | No                                 | No                            | No                                       | No                  |
| 28          | 76/M         | Atheromatous       |                                | Yes             | Extracranial            | Yes              | No                                 | No                            | No                                       | No                  |
| 29          | 78/M         | Atheromatous       |                                | Yes             | Extracranial            | Yes              | No                                 | No                            | No                                       | No                  |
| 30          | 73/F         | Atheromatous       |                                | No              | Intracranial            | No               | No                                 | No                            | No                                       | No                  |
| 31          | 79/M         | Atheromatous       | Aspirin                        | No              | Extracranial            | Yes              | No                                 | No                            | No                                       | No                  |
| 32          | 73/F         | Atheromatous       |                                | No              | Extracranial            | Yes              | Yes                                | No                            | No                                       | No                  |
| 33          | 77/F         | Atheromatous       |                                | Yes             | Extracranial            | Yes              | No                                 | No                            | No                                       | No                  |
| 34          | 61/M         | Atheromatous       | Aspirin                        | No              | Intracranial            | No               | No                                 | Yes                           | No                                       | No                  |
| 35          | 55/M         | Atheromatous       |                                | No              | Intracranial            | No               | No                                 | No                            | No                                       | Yes                 |
| 36          | 66/M         | Atheromatous       | Aspirin                        | Yes             | Extracranial            | Yes              | No                                 | No                            | No                                       | Yes                 |
| 37          | 60/M         | Atheromatous       |                                | No              | Extracranial            | Yes              | No                                 | No                            | No                                       | No                  |
| 38          | 52/M         | Atheromatous       |                                | No              | Extracranial            | Yes              | No                                 | No                            | No                                       | No                  |

**Note:**—PH1 indicates hematoma within infarcted tissue, occupying <30%, no substantive mass effect; PH2, hematoma occupying 30% or more of the infarcted tissue, with obvious mass effect.
